# Supplementary material for: Psychological Resilience and Adverse Mental Health Issues in the Thai Population during the Coronavirus Disease 2019 Pandemic
Source: MDPI journal article supplement (doi:10.3390/ijerph192013023), 2022-10-11
Supplement: s1 [file s1]

## **Online Supplementary Materials**

### **Psychological Resilience and Adverse Mental Health Issues in the Thai Population During the Coronavirus Disease 2019 Pandemic**

Chidchanok Ruengorn, Ratanaporn Awiphan, Chabaphai Phosuya, Yongyuth Ruanta, Nahathai Wongpakaran, Tinakon Wongpakaran, Kednapa Thavorn, Surapon Nochaiwong; for the Health Outcomes and Mental Health Care Evaluation Survey Research Group (HOME-Survey)

**\*Correspondence and requests for materials:**

Kednapa Thavorn, PhD, School of Epidemiology and Public Health, Faculty of Medicine, University of Ottawa, Ottawa, K1G 5Z3 Ontario, Canada, Phone: (613)-7378899 ext 72330, Email: kthavorn@ohri.ca

or

Surapon Nochaiwong, PharmD, Department of Pharmaceutical Care, Faculty of Pharmacy, Chiang Mai University, Chiang Mai 50200, Thailand, Phone: 66899973365, Fax: 6653222741, Email: surapon.nochaiwong@cmu.ac.th

## Supplementary Online Content

**Figure S1** Flow Diagram for Study Participations

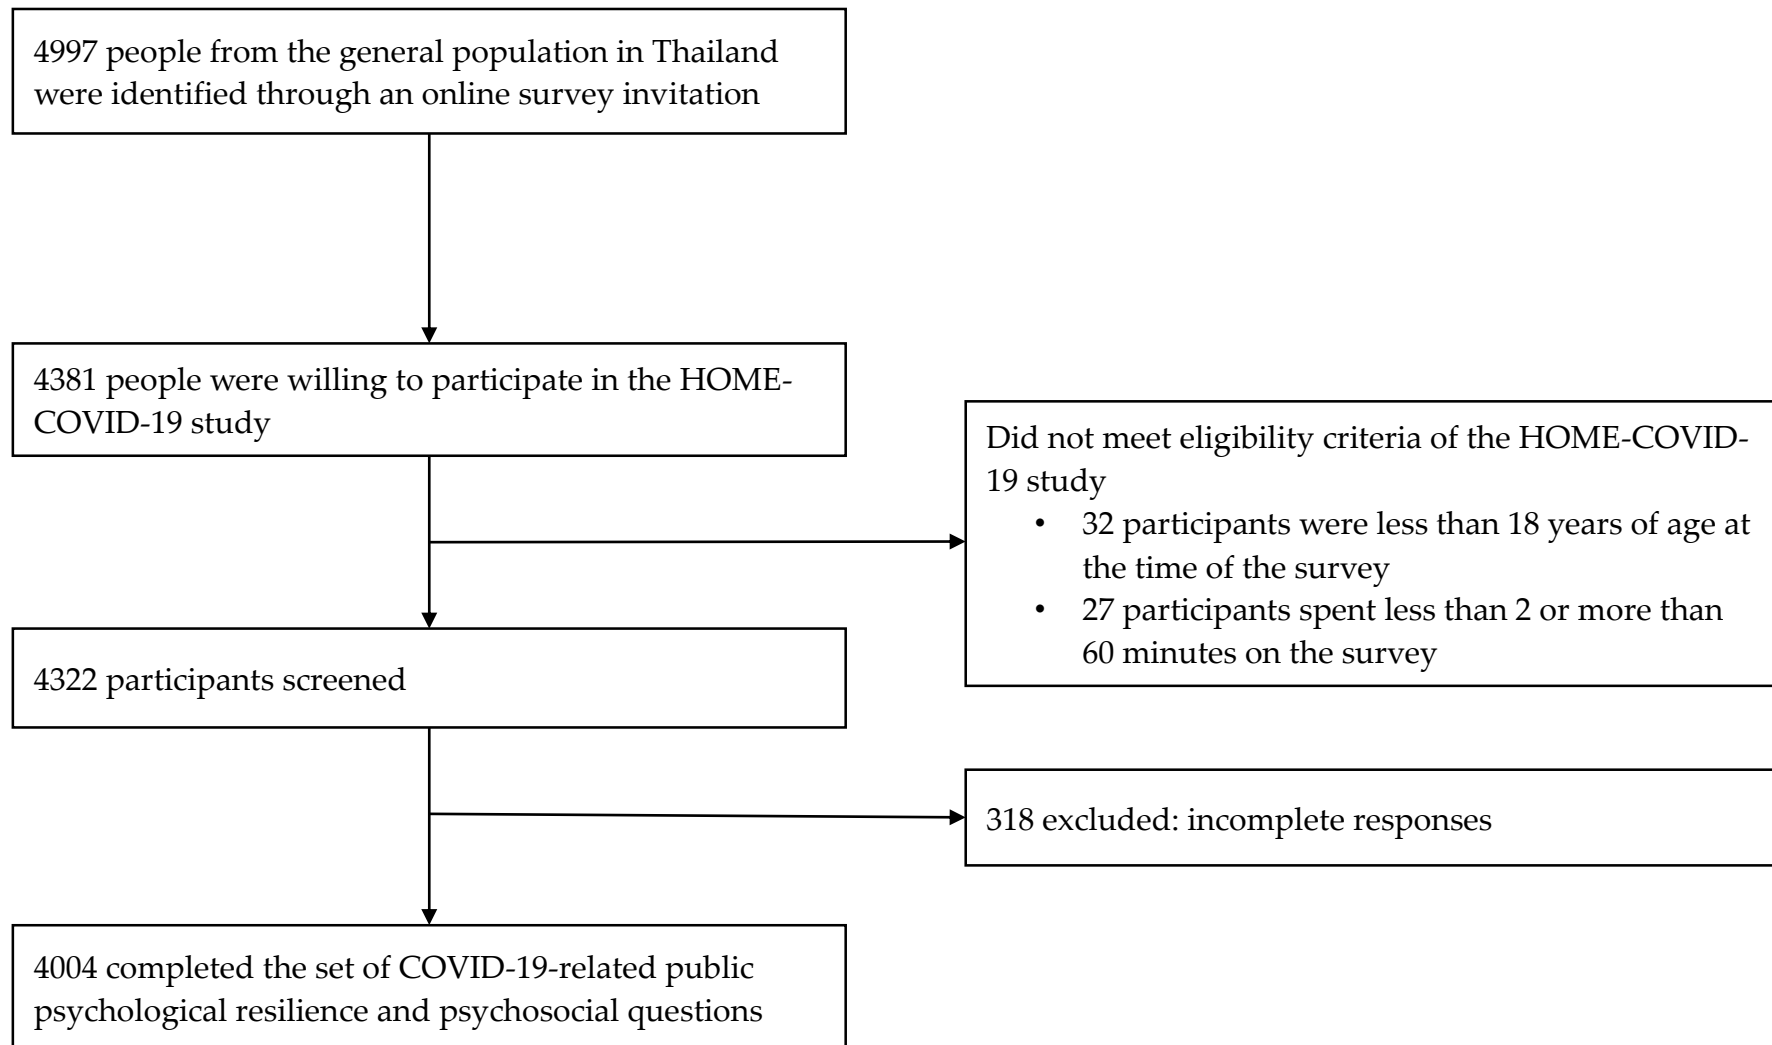

Abbreviation: HOME-COVID-19, The Health Outcomes and Mental Health Care Evaluation Survey Research Group—Coronavirus Disease 2019.
